# Supplementary material for: Kombucha Beverage from Green, Black and Rooibos Teas: A Comparative Study Looking at Microbiology, Chemistry and Antioxidant Activity
Source: MDPI journal article supplement (doi:10.3390/nu11010001), 2018-12-20
Supplement: s1 [file s1]

**Table S1.** Lactobacilli (LAB) and yeasts count on films and kombuchas at 7 and 14 days of fermentation. Different letters are significantly different ( $P \leq 0.05$ ); N.D= not detected

| Substrate | Sample            | LAB ( $\log_{10}$ cfu/mL) | Yeasts ( $\log_{10}$ cfu/mL) |
|-----------|-------------------|---------------------------|------------------------------|
| Green Tea | F <sub>14</sub> G | N.D                       | 7.97±0.08 <sup>a</sup>       |
|           | K <sub>14</sub> G | N.D                       | 7.49±0.09 <sup>b</sup>       |
| Black Tea | F <sub>14</sub> B | N.D                       | 6.83±0.02 <sup>c</sup>       |
|           | K <sub>14</sub> B | N.D                       | 6.91±0.06 <sup>c</sup>       |
| Rooibois  | F <sub>14</sub> R | N.D                       | 7.08±0.01 <sup>c</sup>       |
|           | K <sub>14</sub> R | N.D                       | 7.36±0.01 <sup>b</sup>       |

**Table S2.** Identification and grouping of isolated AAB strains from biofilms and kombucha obtained from fermentation of black. green and rooibos teas.

| Isolates                      | ID (% similarity)                 | Cluster | Isolates                                                                                   |
|-------------------------------|-----------------------------------|---------|--------------------------------------------------------------------------------------------|
| FR-3; FR-10                   | <i>Komagateibacter</i> spp. (99%) | 1       | FR 1.2.3.4.5.6.7.9.10.11.12.13.15.17<br>KB 26.27<br>KG 20.21.22.23.24.25<br>KR 18.19.20.23 |
| FG-14                         | <i>Komagateibacter</i> spp. (99%) | 2       | FB4. FB5. FG14                                                                             |
| FB-12<br>KB-16                | <i>K. intermedius</i> (100%)      | 3       | FB 3.4.5.7.11.12.13<br>FG 14<br>FR 16<br>KB 1.2.3.4.7.15.16<br>KG 19. 20<br>KR 21.22.24    |
| KG-15                         | <i>Komagateibacter</i> spp. (99%) | 4       | FB 1<br>FG 1.2.3.4.5.6.7.8.9<br>KB 10.11.12.14<br>KG 15                                    |
| KR-9                          | <i>K. intermedius</i> (100%)      | 5       | FB 6.8.10<br>KR 7. 9                                                                       |
| KR-17                         | <i>K. rhaeticus</i> (100%)        | 6       | FB 2<br>FG 10.11.12.13.15<br>FR 8<br>KB 5.6.13<br>KG 3.6.8<br>KR 12. 15. 17                |
| KR-11                         | <i>G. entanii</i> (100%)          | 7       | KR 6.8.11.13.14                                                                            |
| KR-1<br>KR-3                  | <i>G. entanii</i> (100%)          | 8       | KR-1; KR-3                                                                                 |
| KR-2<br>KR-4<br>KR-5<br>KG-16 | <i>K. intermedius</i> (100%)      | 8       | KR-2; KR-4; KR-5; KG.16                                                                    |
| KG-2<br>KG-5                  | <i>K. intermedius</i> (100%)      | 9       | KG 1. 2. 4. 5. 7. 9. 10. 11. 12                                                            |
| KG-13                         | <i>G. entanii</i> (100%)          | 10      | KG-13                                                                                      |
| KB-17                         | <i>K. intermedius</i> (100%)      | 11      | KB 17. 18. 19. 20. 21. 22. 23. 24. 25                                                      |

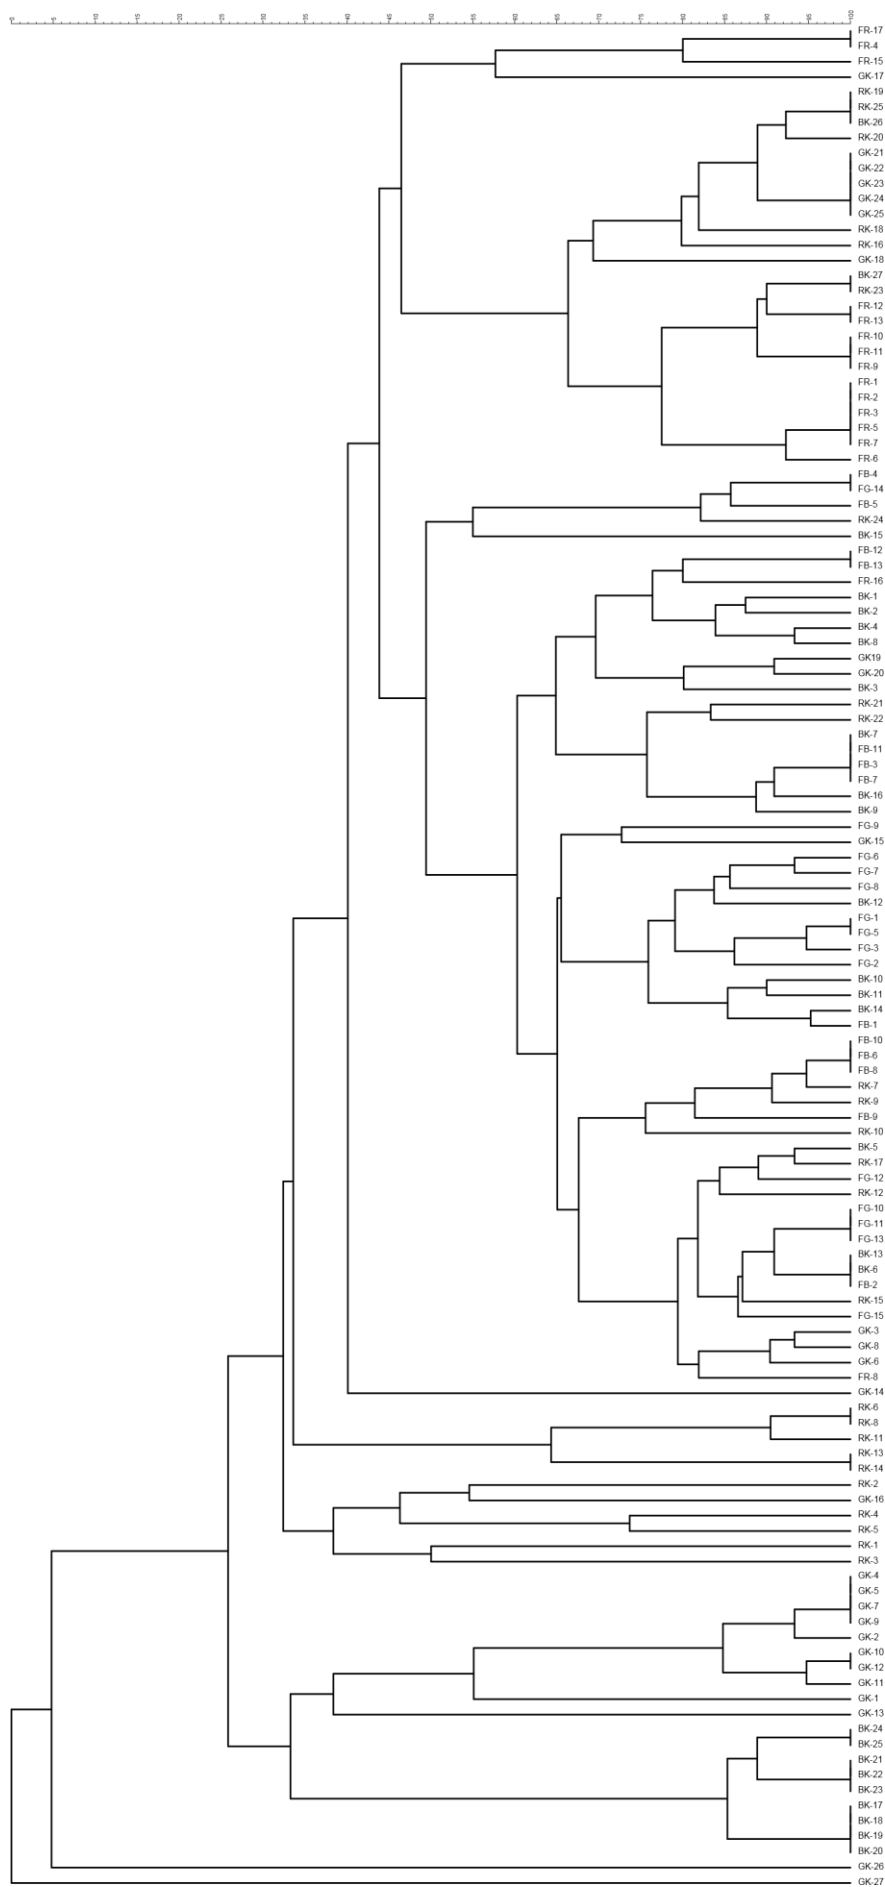

**Figure S1.** Cluster analysis of the AAB profiles obtained by RAPD-PCR. using Bionumerics 7.1 (Applied Maths. Sint-Martens-Latem. Belgium) with the Dice's Coefficient of similarity and the un-weighted pair group method arithmetic averages clustering algorithm (UPGMA).

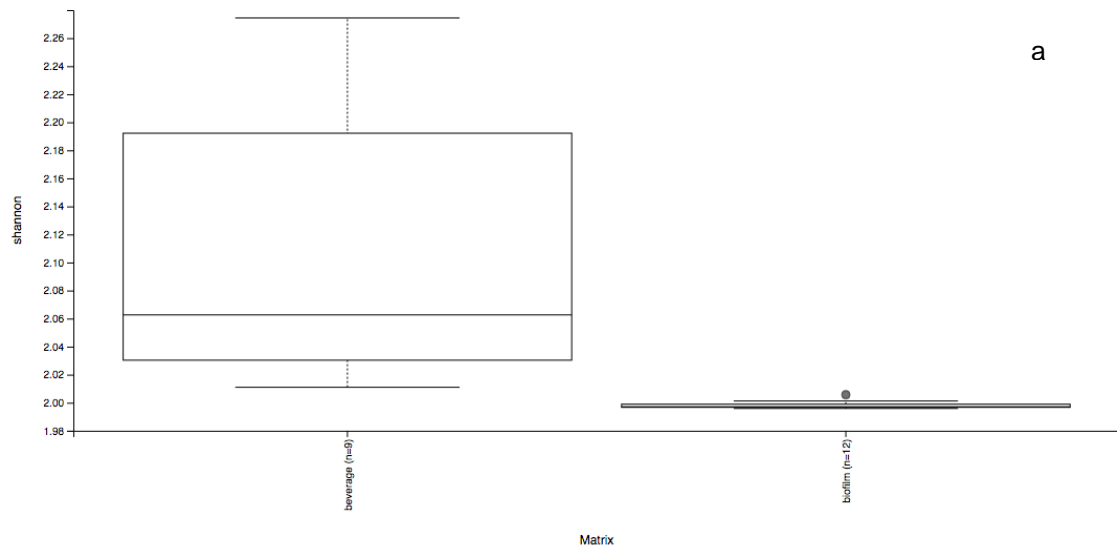

### Kruskal-Wallis (pairwise)

[Download CSV](#)

| Group 1        | Group 2        | H         | p-value  | q-value  |
|----------------|----------------|-----------|----------|----------|
| beverage (n=9) | biofilm (n=12) | 14.727273 | 0.000124 | 0.000124 |

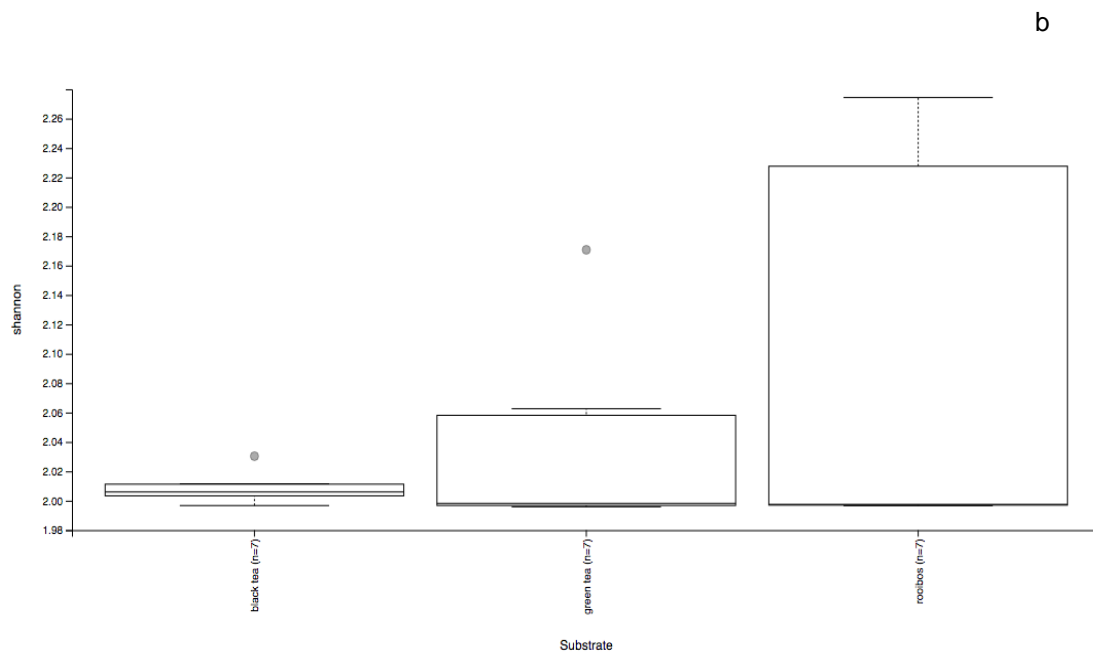

### Kruskal-Wallis (pairwise)

[Download CSV](#)

| Group 1         | Group 2         | H        | p-value  | q-value  |
|-----------------|-----------------|----------|----------|----------|
| black tea (n=7) | green tea (n=7) | 0.036735 | 0.848006 | 0.848006 |
| black tea (n=7) | rooibos (n=7)   | 0.036735 | 0.848006 | 0.848006 |
| green tea (n=7) | rooibos (n=7)   | 0.330612 | 0.565299 | 0.848006 |

**Figure S3.** Alpha diversity of bacterial Component a) Shannon diversity by matrix; b) Shannon diversity by substrate) with Kruskal-Wallis pairwise analysis

a

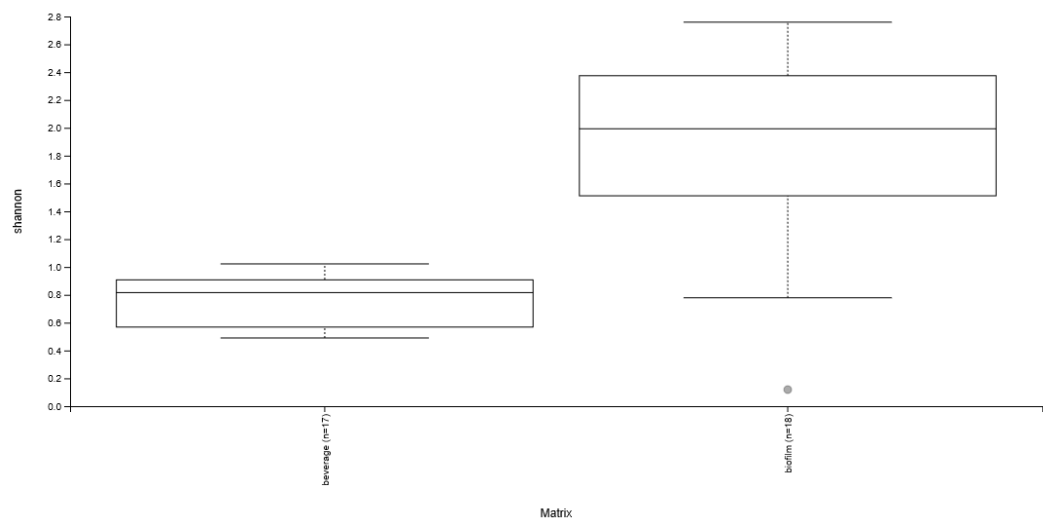

Kruskal-Wallis (pairwise)

[Download CSV](#)

|                 |                | H         | p-value  | q-value  |
|-----------------|----------------|-----------|----------|----------|
| Group 1         | Group 2        |           |          |          |
| beverage (n=17) | biofilm (n=18) | 17.569717 | 0.000028 | 0.000028 |

**b**

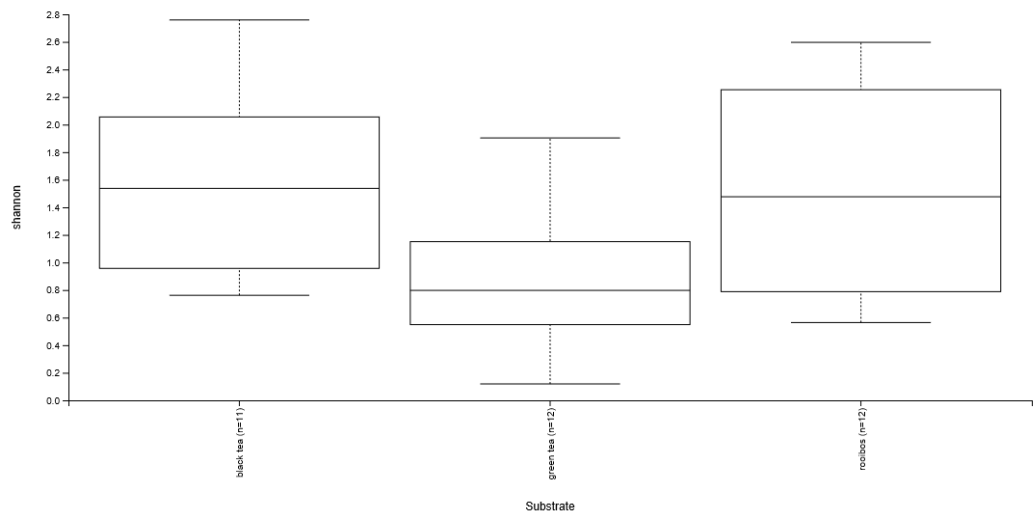

**Kruskal-Wallis (pairwise)**

[Download CSV](#)

|                  |                  | H        | p-value  | q-value  |
|------------------|------------------|----------|----------|----------|
| Group 1          | Group 2          |          |          |          |
| black tea (n=11) | green tea (n=12) | 5.761364 | 0.016382 | 0.049147 |
|                  | rooibos (n=12)   | 0.185606 | 0.666599 | 0.666599 |
| green tea (n=12) | rooibos (n=12)   | 3.853333 | 0.049647 | 0.074471 |

**c**

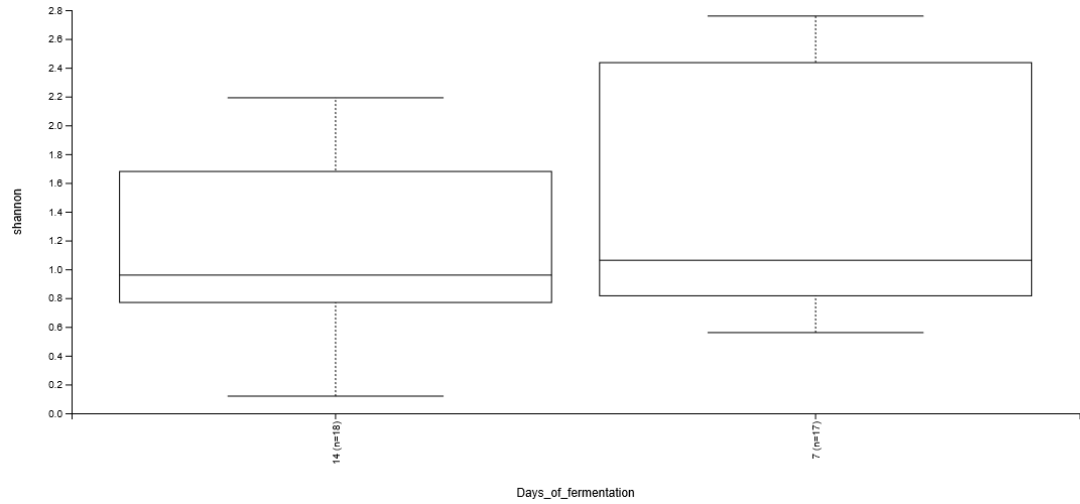

**Kruskal-Wallis (pairwise)**

[Download CSV](#)

|           |          | H        | p-value  | q-value  |
|-----------|----------|----------|----------|----------|
| Group 1   | Group 2  |          |          |          |
| 14 (n=18) | 7 (n=17) | 1.046841 | 0.306236 | 0.306236 |

**Figure S4.** Alpha diversity of fungal component a) Shannon diversity by matrix; b) Shannon diversity by matrix; c) Shannon diversity by days of fermentation with the associated Kruskal-Wallis pairwise analysis

**Table S3.** Relative abundance of bacterial family in beverage and biofilm at 14 days (data expressed as % value)

|                                                 | <b>K<sub>14</sub>B</b> | <b>K<sub>14</sub>G</b> | <b>K<sub>14</sub>R</b> | <b>F<sub>14</sub>B</b> | <b>F<sub>14</sub>G</b> | <b>F<sub>14</sub>R</b> |
|-------------------------------------------------|------------------------|------------------------|------------------------|------------------------|------------------------|------------------------|
| <b>Bifidobacteriaceae</b>                       | 0.0204                 | 0.0669                 | 0.2648                 | 0.0098                 | 0.0052                 | 0.0032                 |
| <b>Corynebacteriaceae</b>                       | 0.0016                 | 0.0046                 | 0.0282                 | 0.0015                 | -                      | -                      |
| <b>Propionibacteriaceae</b>                     | 0.0081                 | 0.0416                 | 0.0825                 | 0.0030                 | -                      | 0.0024                 |
| <b>Coriobacteriaceae</b>                        | -                      | -                      | 0.0049                 | -                      | -                      | -                      |
| <b>Bacteroidaceae</b>                           | 0.0101                 | 0.0149                 | 0.1134                 | 0.0019                 | -                      | 0.0021                 |
| <b>Odoribacteraceae</b>                         | -                      | -                      | 0.0058                 | -                      | -                      | -                      |
| <b>Rikenellaceae</b>                            | 0.0060                 | 0.0135                 | 0.1095                 | 0.0010                 | -                      | -                      |
| <b>Paenibacillaceae</b>                         | 0.0080                 | 0.0160                 | 0.1150                 | -                      | -                      | -                      |
| <b>Staphylococcaceae</b>                        | 0.0013                 | 0.0039                 | 0.0216                 | 0.0010                 | -                      | -                      |
| <b>Lactobacillaceae</b>                         | 0.0023                 | 0.0067                 | 0.0562                 | -                      | -                      | -                      |
| <b>Leuconostocaceae</b>                         | -                      | 0.0020                 | 0.0411                 | -                      | -                      | -                      |
| <b>Streptococcaceae</b>                         | 0.0023                 | 0.0087                 | 0.0973                 | -                      | -                      | -                      |
| <b>Christensenellaceae</b>                      | -                      | -                      | 0.0046                 | -                      | -                      | -                      |
| <b>Lachnospiraceae</b>                          | 0.0059                 | 0.0213                 | 0.2208                 | 0.0010                 | -                      | -                      |
| <b>Clostridiales family XIII incertae sedis</b> | -                      | -                      | 0.0029                 | -                      | -                      | -                      |
| <b>Peptostreptococcaceae</b>                    | 0.0021                 | 0.0011                 | 0.0023                 | -                      | -                      | -                      |
| <b>Methylobacteriaceae</b>                      | 0.0019                 | 0.0215                 | 0.0029                 | -                      | -                      | -                      |
| <b>Rhizobiaceae</b>                             | -                      | 0.0016                 | 0.0054                 | -                      | -                      | -                      |
| <b>Rhodobacteraceae</b>                         | -                      | 0.0015                 | 0.0133                 | -                      | -                      | -                      |
| <b>Acetobacteraceae</b>                         | 99.826                 | 97.689                 | 98.034                 | 99.956                 | 99.983                 | 99.977                 |
| <b>Sphingomonadaceae</b>                        | -                      | 0.0077                 | 0.0222                 | -                      | -                      | -                      |
| <b>Comamonadaceae</b>                           | 0.0020                 | 0.0067                 | 0.0076                 | -                      | -                      | -                      |
| <b>Enterobacteriaceae</b>                       | 0.0092                 | 0.0442                 | 0.2627                 | 0.0045                 | 0.0025                 | 0.0022                 |
| <b>Moraxellaceae</b>                            | -                      | 0.0022                 | 0.0021                 | -                      | -                      | -                      |
| <b>Akkermansiaceae</b>                          | 0.0010                 | 0.0052                 | 0.0378                 | 0.0013                 | -                      | -                      |
| <b>Others</b>                                   | 0.0036                 | 0.0034                 | 0.0055                 | 0.0028                 | 0.0035                 | 0.0040                 |

**Table S4.** - Relative abundance of yeasts family in biofilm at 14 days (data expressed as % value)

|                           | <b>F<sub>7</sub>B</b> | <b>F<sub>7</sub>G</b> | <b>F<sub>7</sub>R</b> | <b>F<sub>14</sub>B</b> | <b>F<sub>14</sub>G</b> | <b>F<sub>14</sub>R</b> |
|---------------------------|-----------------------|-----------------------|-----------------------|------------------------|------------------------|------------------------|
| <b>Pichiaceae</b>         | 60.9953               | 85.8813               | 40.0155               | 77.1077                | 92.2394                | 60.1906                |
| <b>Saccharomycetaceae</b> | 38.9819               | 14.0579               | 57.9034               | 22.8143                | 7.4258                 | 31.8865                |
| <b>Metschnikowiaceae</b>  | 0.0038                | 0.0037                | 0.4743                | -                      | 0.0024                 | 0.0017                 |
| <b>Sporidiobolaceae</b>   | -                     | -                     | 0.0269                | -                      | -                      | 0.0112                 |
| <b>Malasseziaceae</b>     | -                     | -                     | 0.0318                |                        | 0.0079                 | 0.0900                 |
| <b>Pleosporaceae</b>      | -                     | 0.0071                | -                     | 0.0466                 | -                      | 0.0012                 |
| <b>Aspergillaceae</b>     | 0.0049                | -                     | 0.2875                | 0.0231                 | 0.1565                 | 0.3238                 |
| <b>Debaryomycetaceae</b>  | -                     | 0.0028                | -                     | -                      | -                      | -                      |
| <b>Dipodascaceae</b>      | -                     | -                     | -                     | -                      | -                      | -                      |
| <b>Phaffomycetaceae</b>   | -                     | -                     | -                     | -                      | -                      | -                      |
| <b>Cordycipitaceae</b>    | -                     | -                     | 0.0144                | -                      | -                      | -                      |
| <b>Schizoporaceae</b>     | -                     | -                     | 0.1019                | -                      | -                      | -                      |
| <b>Coriolaceae</b>        | -                     | -                     | 0.0000                | -                      | 0.0026                 | -                      |
| <b>Meruliaceae</b>        | -                     | -                     | 0.0163                | -                      | 0.0012                 | 6.7560                 |
| <b>Mrakiaceae</b>         | -                     | -                     | -                     | -                      | -                      | 0.0139                 |
| <b>Tremellaceae</b>       | -                     | -                     | -                     | -                      | -                      | -                      |
| <b>Trichosporonaceae</b>  | -                     | -                     | -                     | -                      | -                      | -                      |
| <b>Others</b>             | 0.0078                | 0.0118                | 1.0341                | 0.0297                 | 0.1633                 | 0.7250                 |



**Table S5.** Relative abundance of yeasts family in beverage at 14 days (data expressed as % value)

|                           | <b>K<sub>7</sub>B</b> | <b>K<sub>7</sub>G</b> | <b>K<sub>7</sub>R</b> | <b>K<sub>14</sub>B</b> | <b>K<sub>14</sub>G</b> | <b>K<sub>14</sub>R</b> |
|---------------------------|-----------------------|-----------------------|-----------------------|------------------------|------------------------|------------------------|
| <b>Pichiaceae</b>         | 91.3660               | 93.5626               | 93.3040               | 91.7686                | 95.7010                | 91.7128                |
| <b>Saccharomycetaceae</b> | 8.5638                | 6.2313                | 5.8145                | 8.2071                 | 4.2126                 | 8.1625                 |
| <b>Metschnikowiaceae</b>  | 0.0135                | 0.0892                | 0.0433                | 0.0029                 | 0.0452                 | 0.0131                 |
| <b>Sporidiobolaceae</b>   | 0.0054                | -                     | -                     | -                      | -                      | -                      |
| <b>Malasseziaceae</b>     | 0.0039                | -                     | 0.0040                | -                      | 0.0013                 | -                      |
| <b>Pleosporaceae</b>      | -                     | 0.0052                | 0.0762                | -                      | 0.0081                 | -                      |
| <b>Aspergillaceae</b>     | -                     | 0.0028                | 0.0000                | 0.0009                 | 0.0005                 | -                      |
| <b>Debaryomycetaceae</b>  | -                     | 0.0102                | 0.0214                | -                      | 0.0022                 | -                      |
| <b>Dipodascaceae</b>      | -                     | -                     | 0.1646                | -                      | -                      | -                      |
| <b>Phaffomycetaceae</b>   | -                     | 0.0298                | 0.1174                | -                      | -                      | 0.0052                 |
| <b>Cordycipitaceae</b>    | -                     | -                     | -                     | -                      | -                      | -                      |
| <b>Schizoporaceae</b>     | -                     | -                     | -                     | -                      | -                      | -                      |
| <b>Coriolaceae</b>        | -                     | -                     | 0.0363                | -                      | -                      | -                      |
| <b>Meruliaceae</b>        | -                     | -                     | -                     | 0.0017                 | -                      | 0.0167                 |
| <b>Mrakiaceae</b>         | -                     | -                     | -                     | -                      | -                      | -                      |
| <b>Tremellaceae</b>       | -                     | -                     | -                     | -                      | -                      | 0.0055                 |
| <b>Trichosporonaceae</b>  | -                     | 0.0048                | 0.0854                | -                      | -                      | 0.0023                 |
| <b>Others</b>             | 0.0388                | 0.0641                | 0.3506                | 0.0109                 | 0.0288                 | 0.0474                 |

**Table S6.** Pairwise Kruskal-Wallis comparisons of alpha diversity of fungal component by Shannon index at 7 and 14 days separate

| <b>7 days samples</b>  |                |             |                |                |
|------------------------|----------------|-------------|----------------|----------------|
| <b>Group 1</b>         | <b>Group 2</b> | <b>H</b>    | <b>p-value</b> | <b>q-value</b> |
| Kombucha (n=8)         | Biofilm (n=9)  | 12          | 0.00053201     | 0.00053201     |
| KB (n=5)               | KG (n=6)       | 1.633333333 | 0.20124262     | 0.60372786     |
| KB (n=5)               | KR (n=6)       | 0.133333333 | 0.71500065     | 0.71500065     |
| KG (n=6)               | KR (n=6)       | 0.41025641  | 0.52183939     | 0.71500065     |
| <b>14 days samples</b> |                |             |                |                |
| <b>Group 1</b>         | <b>Group 2</b> | <b>H</b>    | <b>p-value</b> | <b>q-value</b> |
| Kombucha (n=9)         | Biofilm (n=9)  | 5.475633528 | 0.01928337     | 0.01928337     |
| KB (n=6)               | KG (n=6)       | 5.76923077  | 0.01630917     | 0.04892752     |
| KB (n=6)               | KR (n=6)       | 0           | 1              | 1              |
| KG (n=6)               | KR (n=6)       | 4.33333333  | 0.03737299     | 0.05605948     |

**Table S7.** Beta diversity – Fungal pairwise ANOSIM by Bray-Curtis Dissimilarity. at 7 and 14 days separate

| <b>7 days samples</b>  |         |             |              |            |         |         |
|------------------------|---------|-------------|--------------|------------|---------|---------|
| Group 1                | Group 2 | Sample size | Permutations | R          | p-value | q-value |
| Kombucha               | Biofilm | 17          | 999          | 0.25998264 | 0.011   | 0.011   |
| KB                     | KG      | 11          | 999          | 0.336      | 0.034   | 0.051   |
| KB                     | KR      | 11          | 999          | 0.39466667 | 0.028   | 0.051   |
| KG                     | KR      | 12          | 999          | 0.24814815 | 0.066   | 0.066   |
| <b>14 days samples</b> |         |             |              |            |         |         |
| Group 1                | Group 2 | Sample size | Permutations | R          | p-value | q-value |
| Kombucha               | Biofilm | 18          | 999          | 0.06824417 | 0.064   | 0.064   |
| KB                     | KG      | 12          | 999          | 0.21296296 | 0.004   | 0.006   |
| KB                     | KR      | 12          | 999          | 0.28148148 | 0.003   | 0.006   |
| KG                     | KR      | 12          | 999          | 0.18148148 | 0.024   | 0.024   |
