# Supplementary material for: Kombucha Beverage from Green, Black and Rooibos Teas: A Comparative Study Looking at Microbiology, Chemistry and Antioxidant Activity
Source: MDPI journal article supplement (doi:10.3390/nu11010001), 2018-12-20
Supplement: s1 [file s1]

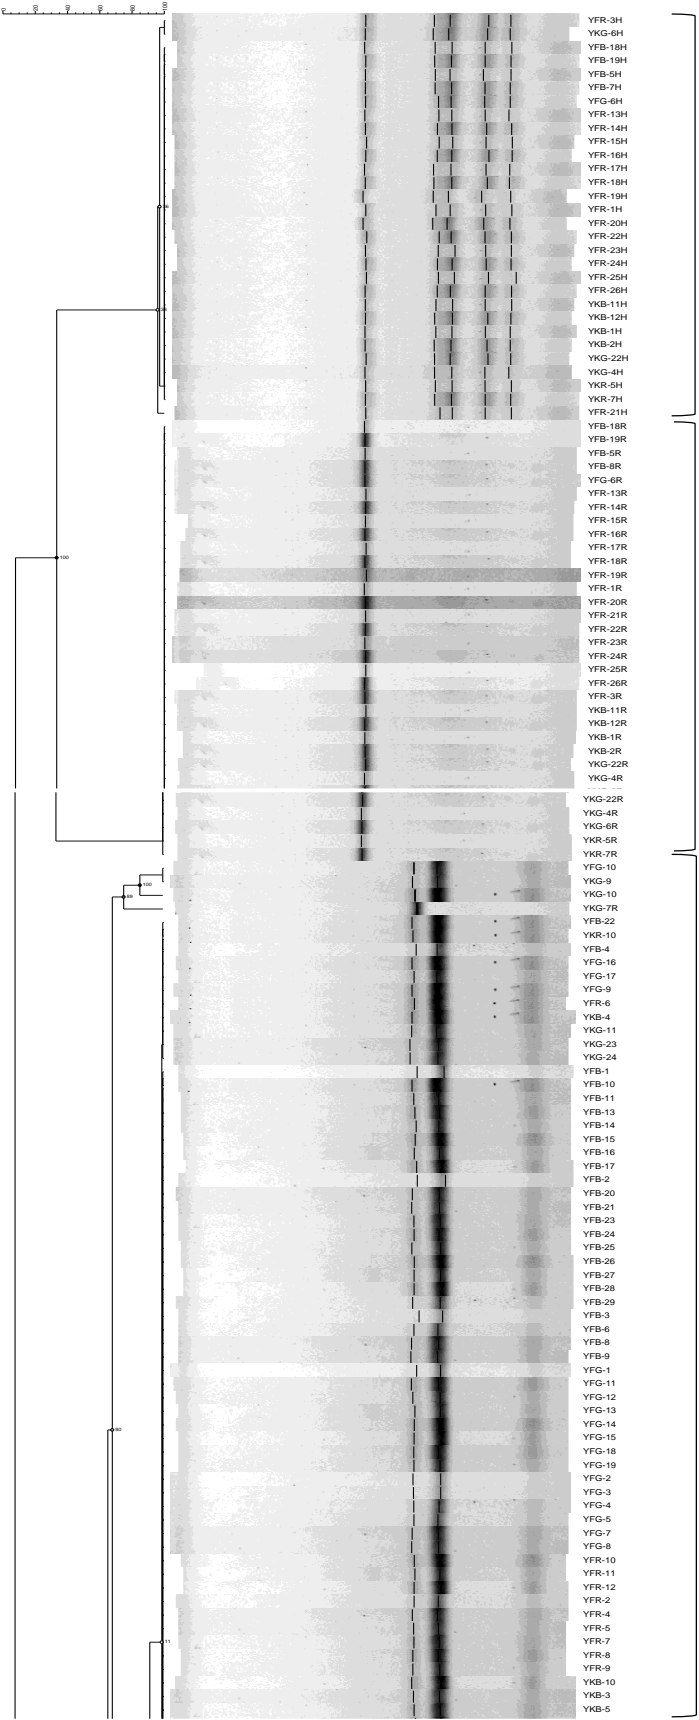

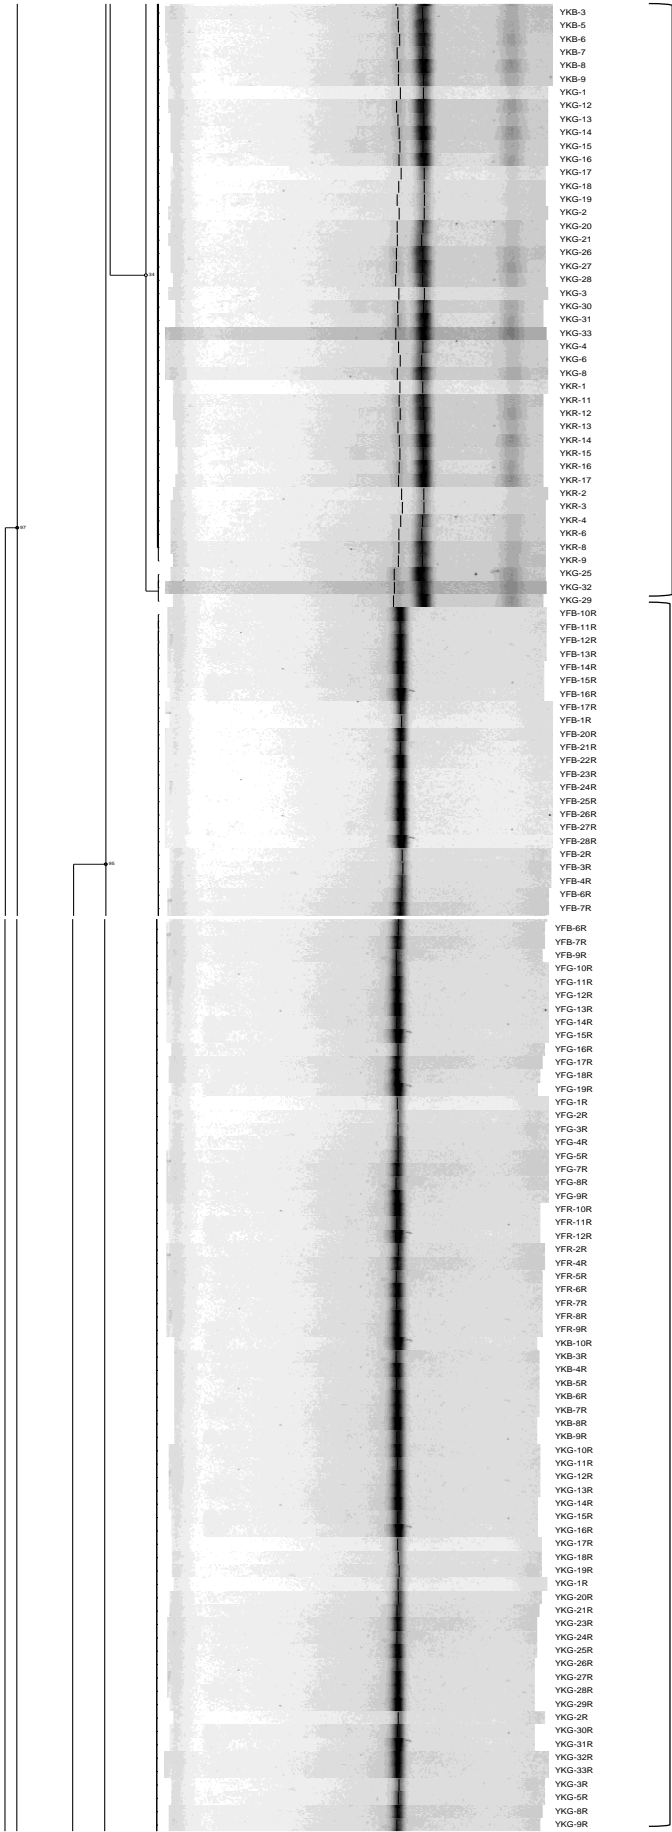

*RsaI* - *Brettanomyces bruxellensis*

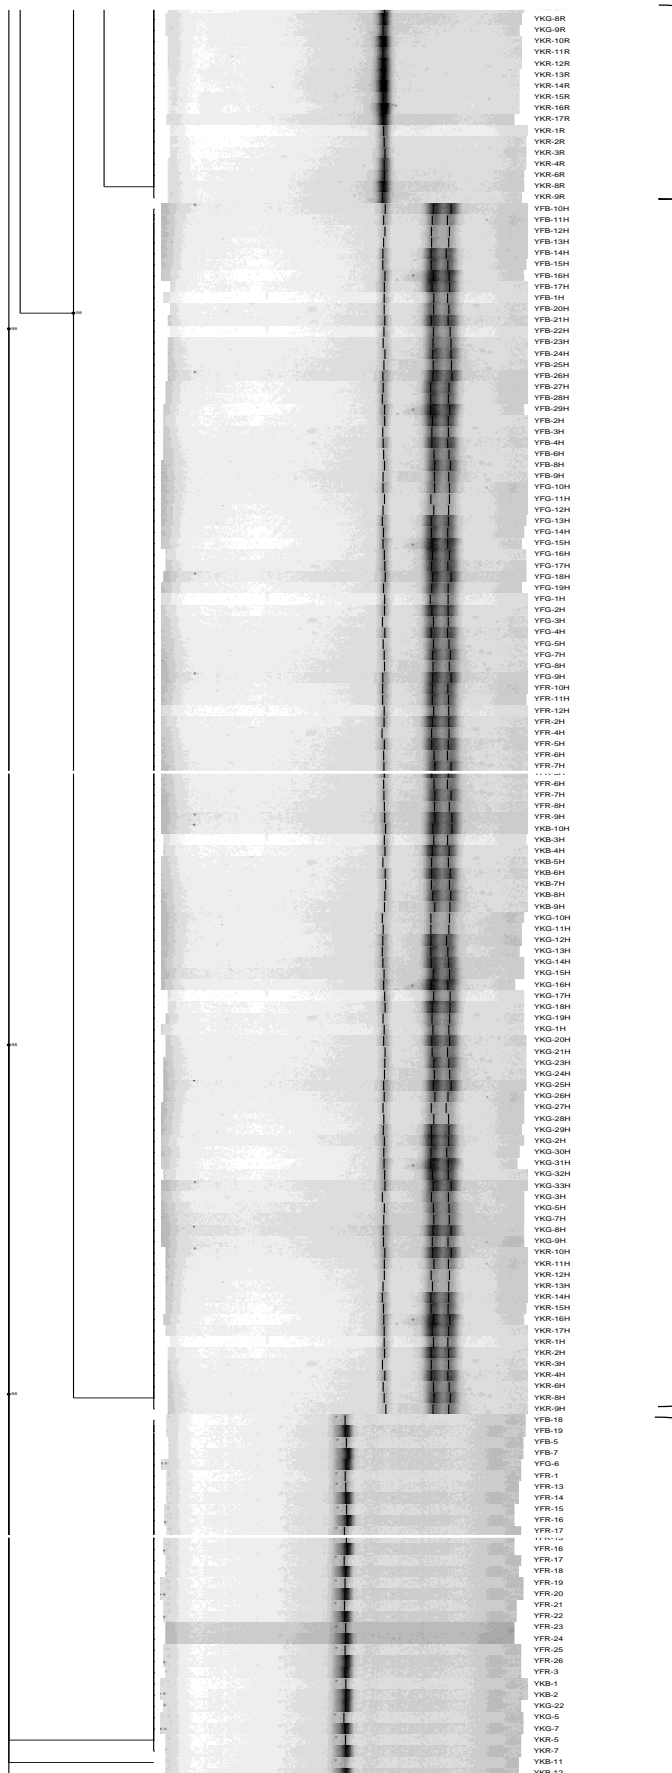

**Figure S2.** – Cluster analysis of RFLP yeasts isolates in kombucha beverage and biofilm obtained using Gel Compare 6.6 (Applied Maths, Sint-Martens-Latem, Belgium). with the Dice's Coefficient of similarity and the un-weighted pair group method arithmetic averages clustering algorithm
